# Supplementary material
Source: PubMed Central journal article supplement (PMC6814349)
Supplement: NIHMS1519872-supplement-8.pdf [file NIHMS1519872-supplement-8.pdf]

**Table S1.** List of parameters used in the model, related to **Figure 2A**.

| <b>Parameter</b> | <b>Meaning</b>                          | <b>Value</b> |
|------------------|-----------------------------------------|--------------|
| $g_L$            | Leak conductance                        | 0.0025 1/s   |
| $V_L$            | Rest potential                          | -90 mV       |
| $g_{C1}$         | Initial cation channel conductance      | 0.0125 1/s   |
| $g_{C2}$         | Final cation channel conductance        | 0.003125 1/s |
| $\delta_C$       | Cation channel decay rate               | 0.025 1/s    |
| $V_0$            | Cation Nernst potential when $C = C_e$  | 1 mV         |
| $C_e$            | Extracellular cation concentration      | 2 mM         |
| $\alpha_{in}$    | Import rate                             | 0.075 1/s    |
| $\alpha_{out}$   | Export rate                             | 0.075 1/s    |
| $F$              | Conductance coefficient                 | 0.0067 mM/mV |
| $\beta_T$        | ThT input rate                          | 0.01 mM/s    |
| $\delta_{hyp}$   | ThT export rate under hyperpolarization | 0.00025 1/s  |
| $\delta_{dep}$   | ThT export rate under depolarization    | 0.005 1/s    |
| $V_S$            | Steepness of the ThT response function  | 0.1 mV       |

**Table S2.** Proteins enriched uniquely in the L22\* mutant, related to **Figure 5**.

Proteins marked in bold are ion transporters. The table lists a description of overexpressed proteins and its expression level in wild-type in the presence of spectinomycin (Spec),  $\Delta$ yhdP,  $\Delta$ L34, and L22\* mutant normalized to wild-type (WT) expression level.

| <b>Protein</b> | <b>Description</b>                                                                 | <b>WT</b> | <b>Spec</b> | <b><math>\Delta</math>yhdP</b> | <b><math>\Delta</math>L34</b> | <b>L22*</b> |
|----------------|------------------------------------------------------------------------------------|-----------|-------------|--------------------------------|-------------------------------|-------------|
| <b>YodF</b>    | Uncharacterized symporter, similar to amino acid permease                          | 1         | 0.83        | 0.69                           | 0.87                          | 1.94        |
| <b>MgtE</b>    | Magnesium transporter MgtE                                                         | 1         | 0.94        | 0.57                           | 0.99                          | 1.87        |
| <b>YybJ</b>    | Uncharacterized ABC transporter ATP-binding protein                                | 1         | 0.91        | 1.04                           | 0.92                          | 1.77        |
| <b>YoaB</b>    | 2-oxoglutarate permease (proton symporter)                                         | 1         | 0.77        | 0.73                           | 0.87                          | 1.68        |
| <b>YhdP</b>    | Magnesium efflux pump                                                              | 1         | 0.93        | 0.27                           | 1.09                          | 1.57        |
| <b>YbeC</b>    | Probable amino acid-proton symporter                                               | 1         | 1.06        | 0.72                           | 0.97                          | 1.56        |
| NtdC           | Glucose-6-phosphate 3-dehydrogenase                                                | 1         | 0.68        | 0.51                           | 0.67                          | 6.25        |
| NtdA           | 3-oxo-glucose-6-phosphate:glutamate aminotransferase                               | 1         | 0.69        | 0.55                           | 0.66                          | 5.02        |
| NtdB           | Kanosamine-6-phosphate phosphatase                                                 | 1         | 0.70        | 0.57                           | 0.62                          | 4.90        |
| YqjL           | General stress protein, putative hydrolase involved in oxidative stress resistance | 1         | 0.92        | 1.09                           | 1.00                          | 2.31        |
| YdiP           | Similar to DNA-3-methyladenine glycosidase II                                      | 1         | 0.94        | 0.93                           | 0.87                          | 1.90        |
| EpsN           | UDP-2,6-dideoxy 2-acetamido 4-keto glucose aminotransferase                        | 1         | 0.66        | 0.83                           | 0.71                          | 1.75        |
| BioD           | ATP-dependent dethiobiotin synthetase                                              | 1         | 0.87        | 1.00                           | 0.94                          | 1.71        |
| YokE           | SPBc2 prophage-derived uncharacterized protein                                     | 1         | 1.07        | 1.09                           | 1.06                          | 1.68        |
| MtnK           | Methylthioribose kinase                                                            | 1         | 0.69        | 0.96                           | 0.96                          | 1.65        |
| PxpC           | 5-oxoprolinase subunit C                                                           | 1         | 1.05        | 0.98                           | 0.87                          | 1.65        |
| YvyE           | IMPACT family member                                                               | 1         | 1.02        | 0.97                           | 1.07                          | 1.57        |
| KipR           | HTH-type transcriptional regulator KipR                                            | 1         | 0.91        | 0.85                           | 0.71                          | 1.56        |
| RapG           | Response regulator aspartate phosphatase G                                         | 1         | 0.99        | 0.97                           | 1.05                          | 1.54        |
| MtnA           | Methylthioribose-1-phosphate isomerase                                             | 1         | 0.95        | 1.03                           | 0.90                          | 1.51        |

**Table S3.** Summary values of parameters measured at the population level for the conditions listed, related to **Figure 7**.

The table lists mean ThT level with its standard deviation (ThT std), hyperpolarized cell fraction and its confidence interval (CI), and number of analyzed cells.

| Condition                    | ThT mean (a.u.) | ThT std | Hyperpolarized cell fraction | CI   | Number of cells |
|------------------------------|-----------------|---------|------------------------------|------|-----------------|
| WT                           | 211.39          | 20.15   | 3.68                         | 0.03 | 1,459,602       |
| WT Spec                      | 229.56          | 42.41   | 28.54                        | 0.07 | 1,404,264       |
| WT Kan                       | 219.89          | 34.24   | 15.76                        | 0.06 | 1,298,188       |
| WT Cm                        | 219.44          | 41.03   | 23.41                        | 0.07 | 1,415,308       |
| WT+20 mM Mg <sup>2+</sup>    | 191.36          | 31.98   | 2.94                         | 0.04 | 781,747         |
| L22*                         | 197.35          | 15.35   | 0.29                         | 0.01 | 896,718         |
| L22* Spec                    | 197.6           | 17.05   | 0.36                         | 0.01 | 1,279,746       |
| ΔL34                         | 237.09          | 47.30   | 35.22                        | 0.07 | 1,741,790       |
| ΔL34+100 mM Mg <sup>2+</sup> | 184.42          | 21.53   | 2.3                          | 0.03 | 1,249,549       |

**Table S4.** Summary values of parameters measured at the single-cell level for the conditions listed, related to **Figure 7**.

The table lists the elongation rate with its standard error (SE), mean number of surviving generations with its standard error (SE), and number of analyzed cells.

| <b>Condition</b>             | <b>Elongation rate (h<sup>-1</sup>)</b> | <b>SE</b> | <b>Surviving generations</b> | <b>SE</b> | <b>Number of cells</b> |
|------------------------------|-----------------------------------------|-----------|------------------------------|-----------|------------------------|
| WT                           | 0.19                                    | 0.01      | 2.85                         | 0.18      | 102                    |
| WT Spec                      | 0.06                                    | 0.01      | 1.22                         | 0.08      | 174                    |
| WT Kan                       | 0.19                                    | 0.01      | 1.56                         | 0.12      | 134                    |
| WT Cm                        | 0.04                                    | 0.01      | 1.31                         | 0.13      | 35                     |
| WT+20 mM Mg <sup>2+</sup>    | 0.19                                    | 0.02      | 3.58                         | 0.10      | 50                     |
| L22*                         | 0.26                                    | 0.01      | 4.02                         | 0.31      | 51                     |
| L22* Spec                    | 0.17                                    | 0.01      | 2.52                         | 0.14      | 100                    |
| ΔL34                         | 0.09                                    | 0.02      | 1.29                         | 0.28      | 35                     |
| ΔL34+100 mM Mg <sup>2+</sup> | 0.23                                    | 0.02      | 2.56                         | 0.34      | 35                     |
