# Supplementary material
Source: PubMed Central journal article supplement (PMC6814349)

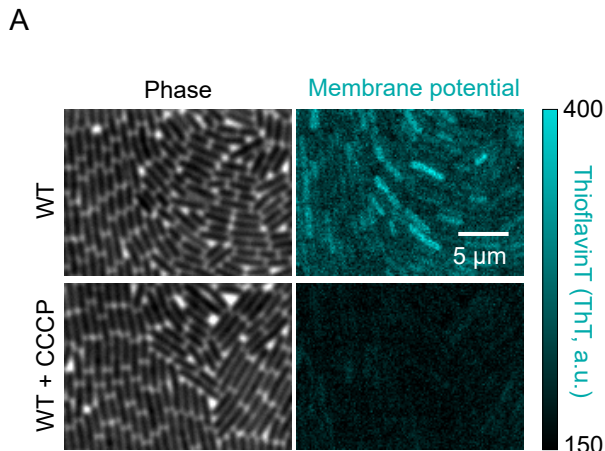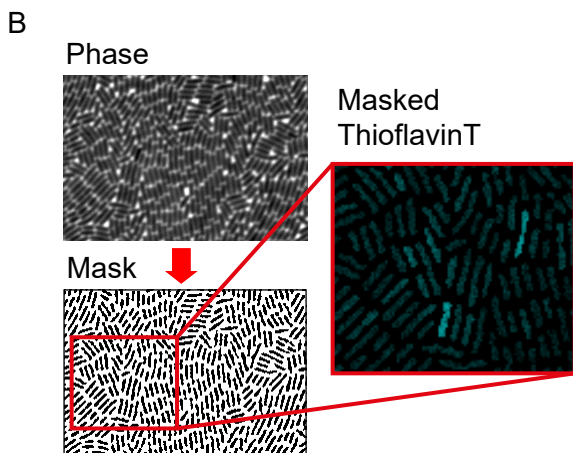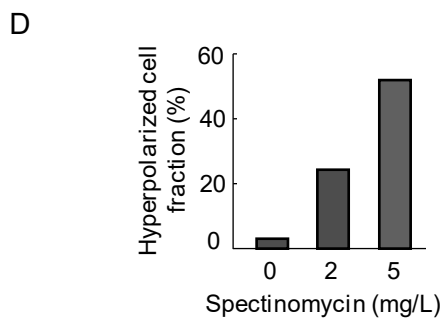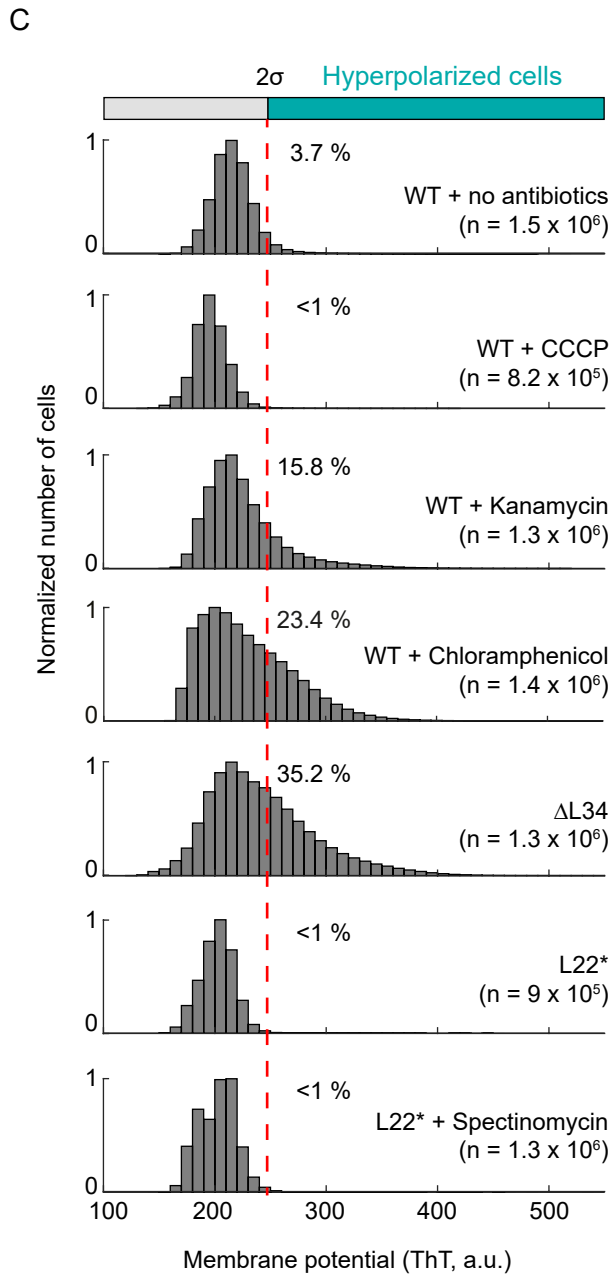

Supplement: NIHMS1519872-supplement-1.pdf [file NIHMS1519872-supplement-1.pdf]

A

### Model prediction

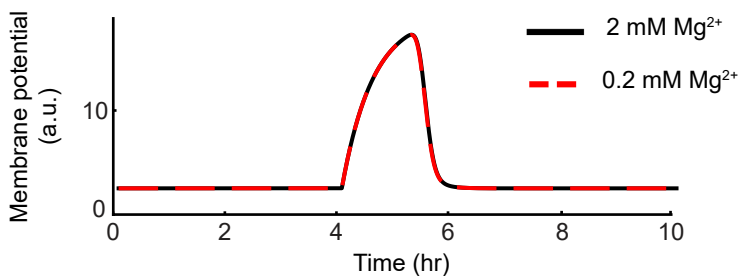

### Experiments

B

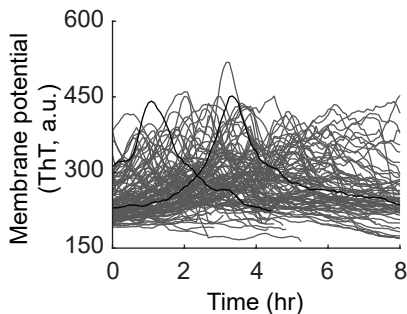

C

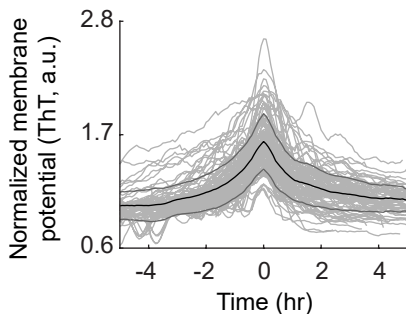

D

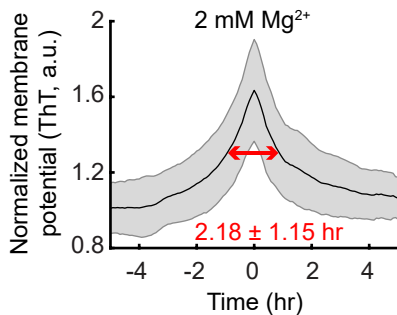

E

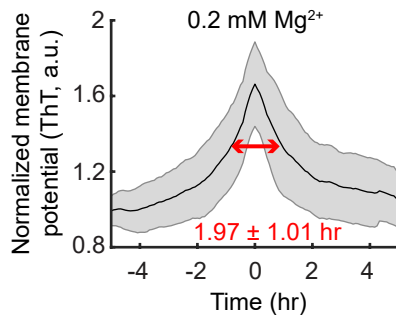

Supplement: NIHMS1519872-supplement-2.pdf [file NIHMS1519872-supplement-2.pdf]

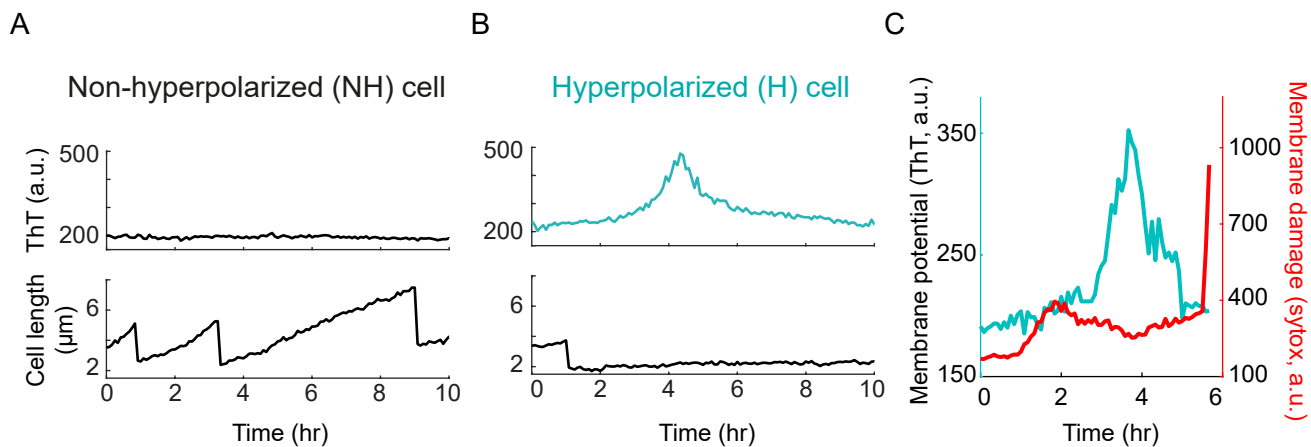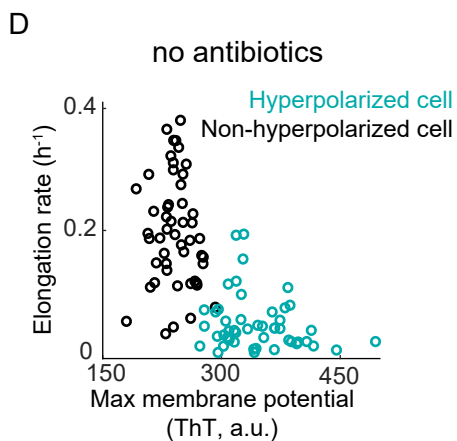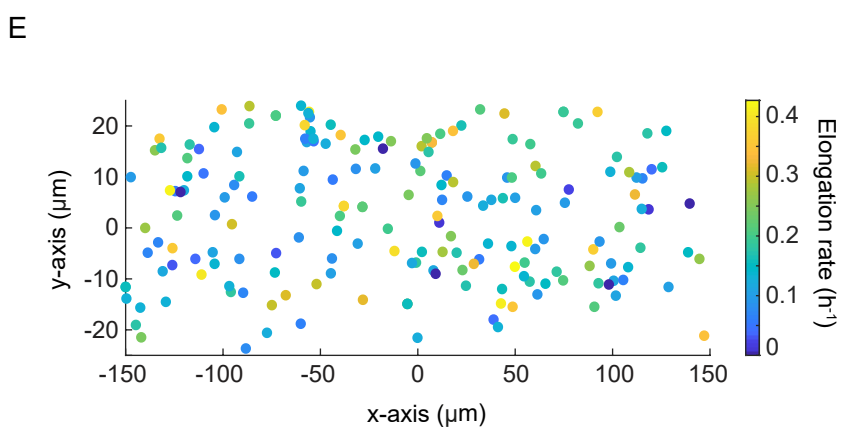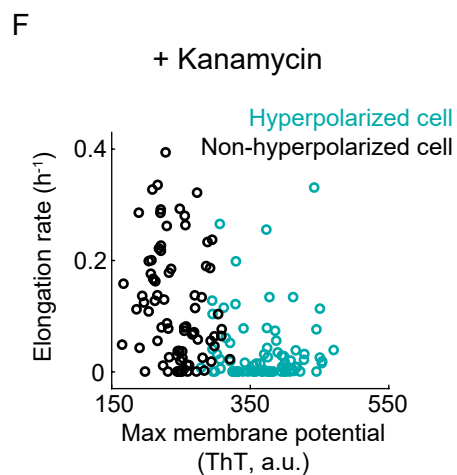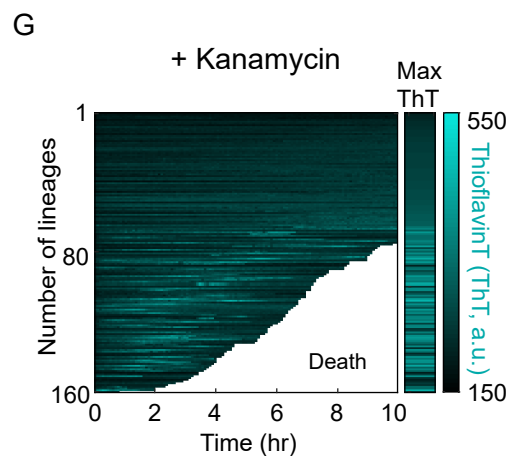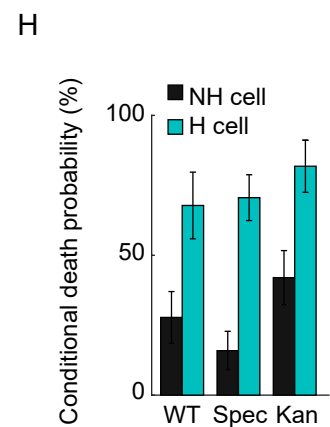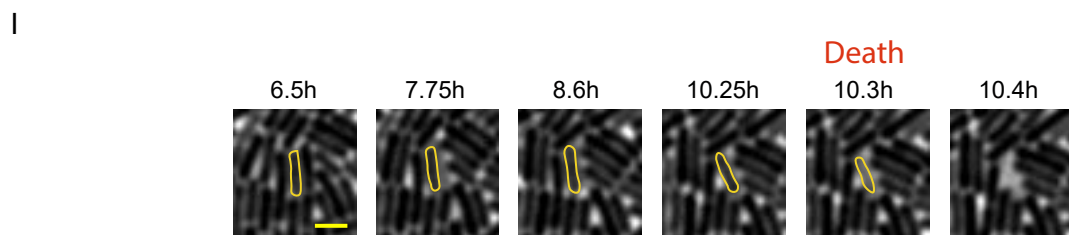

Supplement: NIHMS1519872-supplement-3.pdf [file NIHMS1519872-supplement-3.pdf]

A

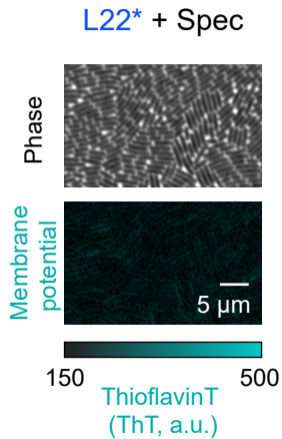

B

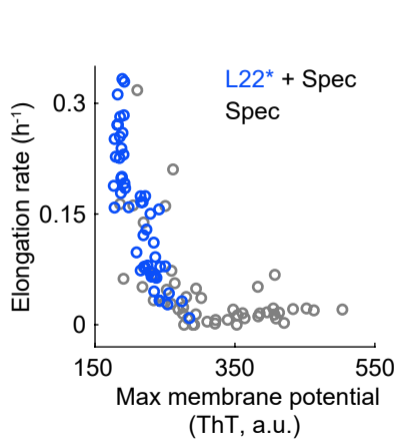

C

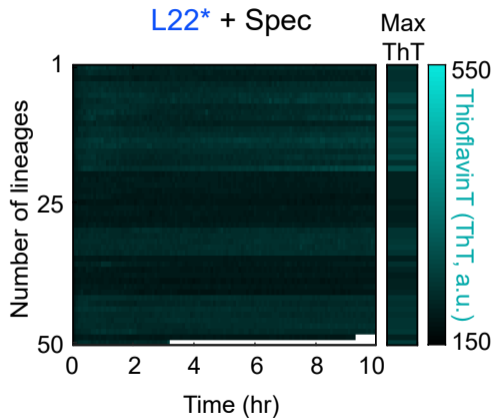

Supplement: NIHMS1519872-supplement-5.pdf [file NIHMS1519872-supplement-5.pdf]

A

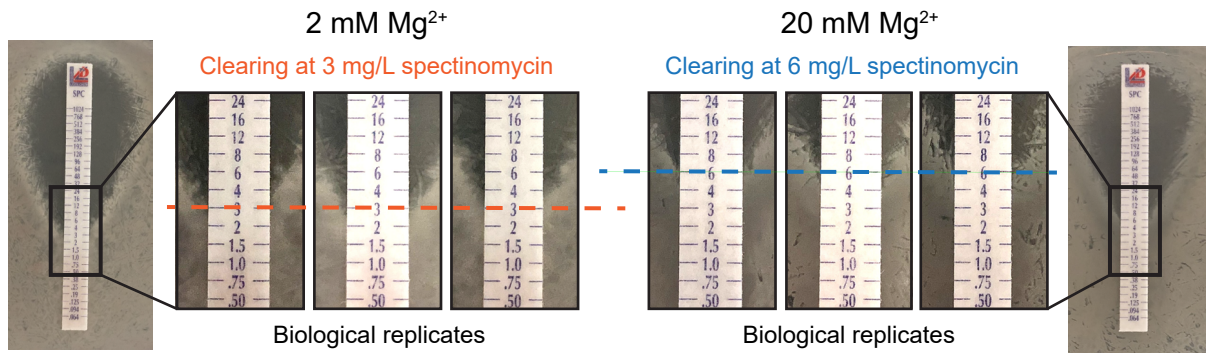

B

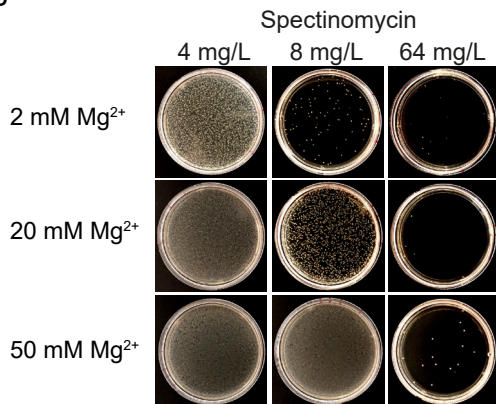

C

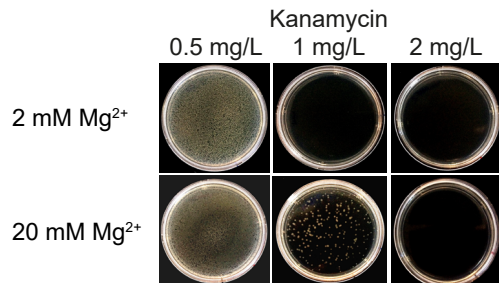

Supplement: NIHMS1519872-supplement-6.pdf [file NIHMS1519872-supplement-6.pdf]
